# Supplementary material for: Gestaltung einer gesundheitsgerechten Arbeitsumgebung: Was brauchen Beschäftigte in kleinen und mittleren Betrieben im ländlichen Raum?
Source: Springer Nature journal article supplement (doi:10.1007/s11553-024-01104-4), 2024-03-05
Supplement: MOESM1 [file 26819804]

## 1. Angaben zu ihrer Person und beruflichen Tätigkeit

- 1.1 Alter:**  18 – 25  
(in Jahren)  26 – 35  
 36 – 45  
 46 – 55  
 56 – 65

- 1.2 Geschlecht:**  Weiblich  
 Männlich  
 Divers

### 1.3 Höchster Schul-/Hochschulabschluss (abgeschlossene Schul-/Hochschulbildung):

- Volksschule, Hauptschule, Mittelschule  Hochschule, Universität  
 Mittlerer Schulabschluss, Mittlere Reife  (Noch) kein Abschluss  
 Abitur, Fachhochschulreife

### 1.4 Aktueller Beschäftigungsgrad:

- Vollzeit  Teilzeit  Geringfügig beschäftigt

### 1.5 Seit wie vielen Jahren arbeiten Sie bereits im Betrieb?

\_\_\_\_\_ Jahre

### 1.6 Haben Sie eine Leitungsfunktion?

- Ja  Nein

## 2. Anforderungen im Arbeitsumfeld und Arbeitszufriedenheit<sup>3</sup>

Nachfolgend sind einige Arbeitsanforderungen aufgeführt. Bitte beurteilen Sie zu jedem Punkt, wie häufig dies bei Ihrer Arbeit vorkommt, ob (1) nie, (2) selten, (3) manchmal oder (4) häufig.

| 2.1 Wie häufig kommt es bei Ihrer Arbeit vor, ...                                                                                           | Nie                      | Selten                   | Manchmal                 | Häufig                   | Belastet Sie das? | Ja                       | Nein                     |
|---------------------------------------------------------------------------------------------------------------------------------------------|--------------------------|--------------------------|--------------------------|--------------------------|-------------------|--------------------------|--------------------------|
| ...dass Sie unter starkem Termin- oder Leistungsdruck arbeiten müssen?                                                                      | <input type="checkbox"/> | <input type="checkbox"/> | <input type="checkbox"/> | <input type="checkbox"/> | →                 | <input type="checkbox"/> | <input type="checkbox"/> |
| ...dass Sie vor neue Aufgaben gestellt werden, in die Sie sich erst mal hineindenken und einarbeiten müssen?                                | <input type="checkbox"/> | <input type="checkbox"/> | <input type="checkbox"/> | <input type="checkbox"/> | →                 | <input type="checkbox"/> | <input type="checkbox"/> |
| ...dass Sie bei der Arbeit gestört oder unterbrochen werden, z. B. durch Kollegen, schlechtes Material, Maschinenstörungen oder Telefonate? | <input type="checkbox"/> | <input type="checkbox"/> | <input type="checkbox"/> | <input type="checkbox"/> | →                 | <input type="checkbox"/> | <input type="checkbox"/> |
| ...dass Dinge von Ihnen verlangt werden, die Sie nicht gelernt haben oder die Sie nicht beherrschen?                                        | <input type="checkbox"/> | <input type="checkbox"/> | <input type="checkbox"/> | <input type="checkbox"/> | →                 | <input type="checkbox"/> | <input type="checkbox"/> |
| ...dass Sie verschiedenartige Arbeiten oder Vorgänge gleichzeitig im Auge behalten müssen?                                                  | <input type="checkbox"/> | <input type="checkbox"/> | <input type="checkbox"/> | <input type="checkbox"/> | →                 | <input type="checkbox"/> | <input type="checkbox"/> |
| ...dass Sie bis an die Grenzen der Leistungsfähigkeit gehen müssen?                                                                         | <input type="checkbox"/> | <input type="checkbox"/> | <input type="checkbox"/> | <input type="checkbox"/> | →                 | <input type="checkbox"/> | <input type="checkbox"/> |
| ...dass Sie sehr eigenverantwortlich, selbstbestimmt arbeiten müssen?                                                                       | <input type="checkbox"/> | <input type="checkbox"/> | <input type="checkbox"/> | <input type="checkbox"/> | →                 | <input type="checkbox"/> | <input type="checkbox"/> |
| ...dass es Ihnen schwerfällt, nach der Arbeit abzuschalten?                                                                                 | <input type="checkbox"/> | <input type="checkbox"/> | <input type="checkbox"/> | <input type="checkbox"/> | →                 | <input type="checkbox"/> | <input type="checkbox"/> |
| ...dass Ihre Tätigkeit Sie in Situationen bringt, die Sie gefühlsmäßig belasten?                                                            | <input type="checkbox"/> | <input type="checkbox"/> | <input type="checkbox"/> | <input type="checkbox"/> | →                 | <input type="checkbox"/> | <input type="checkbox"/> |

<sup>3</sup> Quelle: Bundesanstalt für Arbeitsschutz und Arbeitsmedizin (BAuA), Grundauswertung der BIBB/BAuA-Erwerbstätigenbefragung 2018; doi:10.21934/baua:bericht20190618 (online); <https://www.baua.de/DE/Angebote/Publikationen/Berichte/Gd73.html>

| 2.2 Überforderung/Unterforderung                                                                                                                                            | In der Regel den Anforderungen gewachsen | Eher überfordert         | Eher unterfordert        |
|-----------------------------------------------------------------------------------------------------------------------------------------------------------------------------|------------------------------------------|--------------------------|--------------------------|
| Fühlen Sie sich in Ihrer Tätigkeit den Anforderungen an Ihre <b>fachlichen Kenntnisse und Fertigkeiten</b> in der Regel gewachsen, eher überfordert oder eher unterfordert? | <input type="checkbox"/>                 | <input type="checkbox"/> | <input type="checkbox"/> |
| Fühlen Sie sich den Anforderungen durch die <b>Arbeitsmenge bzw. das Arbeitspensum</b> in der Regel gewachsen, eher überfordert oder eher unterfordert?                     | <input type="checkbox"/>                 | <input type="checkbox"/> | <input type="checkbox"/> |

Nachfolgend sind verschiedene Aspekte von Arbeit aufgeführt. Bitte beurteilen Sie, ob Sie damit sehr zufrieden (1), zufrieden (2), weniger zufrieden (3) oder nicht zufrieden (4) sind:

| 2.3 Wie zufrieden sind Sie...,                                 | Sehr zufrieden           | Zufrieden                | Weniger zufrieden        | Nicht zufrieden          |
|----------------------------------------------------------------|--------------------------|--------------------------|--------------------------|--------------------------|
| ...mit dem Einkommen aus Ihrer Tätigkeit?                      | <input type="checkbox"/> | <input type="checkbox"/> | <input type="checkbox"/> | <input type="checkbox"/> |
| ...mit Ihrer derzeitigen Arbeitszeit?                          | <input type="checkbox"/> | <input type="checkbox"/> | <input type="checkbox"/> | <input type="checkbox"/> |
| ...mit dem Betriebsklima?                                      | <input type="checkbox"/> | <input type="checkbox"/> | <input type="checkbox"/> | <input type="checkbox"/> |
| ...mit dem Führungsstil Ihres direkten Vorgesetzten?           | <input type="checkbox"/> | <input type="checkbox"/> | <input type="checkbox"/> | <input type="checkbox"/> |
| ...mit der Fehlerkultur in Ihrem Unternehmen?                  | <input type="checkbox"/> | <input type="checkbox"/> | <input type="checkbox"/> | <input type="checkbox"/> |
| ...mit dem offenen Umgang / Ehrlichkeit Ihrem Unternehmen?     | <input type="checkbox"/> | <input type="checkbox"/> | <input type="checkbox"/> | <input type="checkbox"/> |
| ...mit Art und Inhalt der Tätigkeit?                           | <input type="checkbox"/> | <input type="checkbox"/> | <input type="checkbox"/> | <input type="checkbox"/> |
| ...mit den Möglichkeiten, Ihre Fähigkeiten anzuwenden?         | <input type="checkbox"/> | <input type="checkbox"/> | <input type="checkbox"/> | <input type="checkbox"/> |
| ...mit den körperlichen Arbeitsbedingungen?                    | <input type="checkbox"/> | <input type="checkbox"/> | <input type="checkbox"/> | <input type="checkbox"/> |
| ...mit der Arbeitsplatzgestaltung / Ergonomie am Arbeitsplatz? | <input type="checkbox"/> | <input type="checkbox"/> | <input type="checkbox"/> | <input type="checkbox"/> |

|                                                                                                  | Sehr zufrieden           | Zufrieden                | Weniger zufrieden        | Nicht zufrieden          |
|--------------------------------------------------------------------------------------------------|--------------------------|--------------------------|--------------------------|--------------------------|
| <b>2.4 Und nun alles in allem betrachtet: Wie zufrieden sind Sie mit Ihrer Arbeit insgesamt?</b> | <input type="checkbox"/> | <input type="checkbox"/> | <input type="checkbox"/> | <input type="checkbox"/> |

**2.5 Was ist positiv an Ihrer Arbeit bzw. gefällt Ihnen gut in Ihrem Betrieb/Unternehmen?**

---

---

---

---

---

---

---

---

**2.6 Was könnte an Ihrer Arbeit bzw. in Ihrem Betrieb/Unternehmen zukünftig noch verbessert werden?**

---

---

---

---

---

---

---

---

### 3. Bedarf an Maßnahmen der Betrieblichen Gesundheitsförderung (BGF)

Die folgende Auflistung enthält Themenfelder der BGF. Welche dieser Themenfelder kennen Sie bereits und zu welchen würden Sie sich **für Ihre Arbeit** Maßnahmen/Angebote wünschen? (Mehrfachangaben möglich)

| 3.1 Themenfelder BGF                              | Themenfeld kenne ich     | Maßnahmen dazu würde ich mir wünschen | Thema ist mir <u>un</u> bekannt |
|---------------------------------------------------|--------------------------|---------------------------------------|---------------------------------|
| a) Arbeits- bzw. Betriebsorganisation             | <input type="checkbox"/> | <input type="checkbox"/>              | <input type="checkbox"/>        |
| b) Arbeitszeitmodelle/Schichtmodelle              | <input type="checkbox"/> | <input type="checkbox"/>              | <input type="checkbox"/>        |
| c) Bewegung                                       | <input type="checkbox"/> | <input type="checkbox"/>              | <input type="checkbox"/>        |
| d) Entspannung                                    | <input type="checkbox"/> | <input type="checkbox"/>              | <input type="checkbox"/>        |
| e) Ergonomie am Arbeitsplatz                      | <input type="checkbox"/> | <input type="checkbox"/>              | <input type="checkbox"/>        |
| f) Ernährung                                      | <input type="checkbox"/> | <input type="checkbox"/>              | <input type="checkbox"/>        |
| g) Gestaltung Arbeitstätigkeit/Arbeitsbedingungen | <input type="checkbox"/> | <input type="checkbox"/>              | <input type="checkbox"/>        |
| h) Gesunder Rücken                                | <input type="checkbox"/> | <input type="checkbox"/>              | <input type="checkbox"/>        |
| i) Gesundheitsgerechte Führung                    | <input type="checkbox"/> | <input type="checkbox"/>              | <input type="checkbox"/>        |
| j) Gesundheitskompetenz                           | <input type="checkbox"/> | <input type="checkbox"/>              | <input type="checkbox"/>        |
| k) Informations- und Kommunikationskultur         | <input type="checkbox"/> | <input type="checkbox"/>              | <input type="checkbox"/>        |
| l) Mobbing am Arbeitsplatz                        | <input type="checkbox"/> | <input type="checkbox"/>              | <input type="checkbox"/>        |
| m) Psychische Belastungen bzw. Ressourcen         | <input type="checkbox"/> | <input type="checkbox"/>              | <input type="checkbox"/>        |
| n) Stressbelastung/Stressbewältigung              | <input type="checkbox"/> | <input type="checkbox"/>              | <input type="checkbox"/>        |
| o) Suchtprävention                                | <input type="checkbox"/> | <input type="checkbox"/>              | <input type="checkbox"/>        |
| p) Teamarbeit                                     | <input type="checkbox"/> | <input type="checkbox"/>              | <input type="checkbox"/>        |

Weitere Vorschläge: \_\_\_\_\_

\_\_\_\_\_

\_\_\_\_\_

| 3.2 Häufigkeit von BGF-Maßnahmen                                                                                                              | Nie                      | 1x im Halbjahr           | 1x im Quartal            | 1x im Monat              | Jede Woche               | Täglich                  |
|-----------------------------------------------------------------------------------------------------------------------------------------------|--------------------------|--------------------------|--------------------------|--------------------------|--------------------------|--------------------------|
| Wie häufig sollten Ihre Ansicht nach gesundheitsförderliche Maßnahmen in Ihrem Betrieb, Ihrem Unternehmen bzw. Ihrer Einrichtung stattfinden? | <input type="checkbox"/> |

| 3.3 Zeitrahmen für BGF-Maßnahmen                                                                                    | Weniger als 30 Minuten   | 30 bis 60 Minuten        | Mehr als 60 Minuten      |
|---------------------------------------------------------------------------------------------------------------------|--------------------------|--------------------------|--------------------------|
| Wie viel Zeit würden Sie für gesundheitsförderliche Maßnahmen in Ihrem Betrieb je Angebotseinheit aufwenden wollen? | <input type="checkbox"/> | <input type="checkbox"/> | <input type="checkbox"/> |
